# Supplementary material
Source: PubMed Central journal article supplement (PMC6756953)
Supplement: NIHMS1535899-supplement-Supplemental_Material.pdf [file NIHMS1535899-supplement-Supplemental_Material.pdf]

## **Supplemental Material**

### **Infection During Delivery Hospitalization and Risk of Readmission for Postpartum Stroke**

Eliza C. Miller MD (1), Timothy Wen MD MPH (2), Mitchell S. V. Elkind MD MS (1, 3),  
Alexander Friedman MD (2), Amelia Boehme PhD MSPH (1, 3)

1. Department of Neurology, Columbia University Vagelos College of Physicians and Surgeons
2. Department of Obstetrics and Gynecology, Columbia University Vagelos College of Physicians and Surgeons
3. Department of Epidemiology, Columbia University Mailman School of Public Health

**Supplemental Table I. Diagnostic codes used to identify infections during delivery hospitalizations.**

|                                                                       |                                                                                                                                                                                                                                                                                                                                                                                                                                                                                                                                                                                                                                                                                                                                                                                                                                                                                                                                                                                                                                                                                                                                                                                                                                                                                                                                                                                                                                                                                        |
|-----------------------------------------------------------------------|----------------------------------------------------------------------------------------------------------------------------------------------------------------------------------------------------------------------------------------------------------------------------------------------------------------------------------------------------------------------------------------------------------------------------------------------------------------------------------------------------------------------------------------------------------------------------------------------------------------------------------------------------------------------------------------------------------------------------------------------------------------------------------------------------------------------------------------------------------------------------------------------------------------------------------------------------------------------------------------------------------------------------------------------------------------------------------------------------------------------------------------------------------------------------------------------------------------------------------------------------------------------------------------------------------------------------------------------------------------------------------------------------------------------------------------------------------------------------------------|
| Influenza                                                             | 079.89, 079.99, 460, 462, 464, 464.0, 464.1, 464.10, 464.2, 464.20, 465, 465.0, 465.8, 465.9, 466, 466.0, 466.1, 466.19, 478.9, 480, 487, 487.0, 487.1, 487.8, 490, 780.6, 780.6, 784.1, 786.2                                                                                                                                                                                                                                                                                                                                                                                                                                                                                                                                                                                                                                                                                                                                                                                                                                                                                                                                                                                                                                                                                                                                                                                                                                                                                         |
| Respiratory/Pneumonia                                                 | 032.0, 032.1, 032.2, 032.3, 032.84, 055.1, 073.0, 112.4, 114.0, 114.4, 114.5, 115.05, 115.15, 115.95, 130.4, 136.3, 480.0, 480.1, 480.2, 480.3, 480.8, 480.9, 460, 481, 484.5, 484.6, 513.0, 517.1, 784.9, 482.0, 482.1, 482.2, 482.3, 482.30, 482.31, 482.3, 482.3, 482.4, 482.40, 482.41, 482.42, 482.49, 482.8, 482.81, 482.82, 482.83, 482.84, 482.89, 482.9, 483, 483.0, 483.1, 483.8, 484.1, 484.3, 484.5, 484.6, 484.7, 484.8, 461.0, 461.1, 461.2, 461.3, 461.8, 461.9, 462, 464, 464.0, 464.00, 464.01, 464.1, 464.10, 464.11, 464.2, 464.2, 464.21, 464.3, 464.30, 464.31, 464.4, 464.5, 464.50, 464.51, 465, 465.0, 465.8, 465.9, 485, 473, 473.0, 473.1, 473.2, 473.3, 473.8, 473.9, 480, 480.0, 480.1, 480.2, 480.3, 480.8, 480.9, 011, 012, 033, 033.0, 033.1, 033.8, 033.9, 021.2, 022.1, 034.0, 039.1, 052.1                                                                                                                                                                                                                                                                                                                                                                                                                                                                                                                                                                                                                                                           |
| Genitourinary/urinary tract infection                                 | 590.0, 590.00, 590.01, 590.10, 590.11, 590.2, 590.3, 590.8, 590.80, 590.81, 590.9, 595.0, 595.1, 595.2, 595.3, 595.4, 595.8, 595.81, 595.82, 595.89, 595.9, 597, 597.0, 597.8, 597.80, 597.81, 597.89, 598, 598.0, 598.00, 598.01, 599.0, 658.4, 658.40, 658.43, 670.0, 670.00, 670.02, 670.04, 670.1, 670.10, 670.12, 670.14, 670.8, 670.80, 670.82, 670.84                                                                                                                                                                                                                                                                                                                                                                                                                                                                                                                                                                                                                                                                                                                                                                                                                                                                                                                                                                                                                                                                                                                           |
| Sexually transmitted infections                                       | 054, 054.0, 054.1, 054.10, 054.11, 054.12, 054.13, 054.19, 054.2, 054.3, 054.4, 054.40, 054.41, 054.2, 054.3, 054.4, 054.40, 054.41, 054.41, 054.42, 054.43, 054.44, 054.49, 054.5, 054.6, 054.7, 054.71, 054.72, 054.73, 054.74, 054.79, 054.8, 054.9, 091, 091.0, 091.1, 091.2, 091.3, 091.4, 091.5, 091.50, 091.51, 091.52, 091.6, 091.61, 091.62, 091.69, 091.7, 091.8, 091.81, 091.82, 091.89, 091.9, 092, 092.0, 092.9, 093, 093.0, 093.1, 093.2, 093.20, 093.21, 093.22, 093.23, 093.24, 093.8, 093.81, 093.82, 093.89, 093.9, 094, 094.1, 094.2, 094.3, 094.8, 094.81, 094.83, 094.84, 094.85, 094.86, 094.87, 094.87, 094.89, 094.9, 095, 095.0, 095.1, 095.2, 095.3, 095.4, 095.5, 095.6, 095.7, 095.8, 095.9, 096, 097, 097.0, 097.1, 097.9, 098, 098.0, 098.1, 098.10, 098.11, 098.12, 098.13, 098.14, 098.15, 098.16, 098.17, 098.19, 098.2, 098.3, 098.30, 098.31, 098.32, 098.33, 098.34, 098.35, 098.36, 098.37, 098.38, 098.39, 098.4, 098.40, 098.41, 098.42, 098.43, 098.49, 098.5, 098.50, 098.51, 098.52, 098.53, 098.59, 098.6, 098.7, 098.8, 098.81, 098.82, 098.83, 098.84, 098.85, 098.86, 098.89, 099, 099.0, 099.1, 099.2, 099.3, 099.4, 099.40, 099.41, 099.49, 099.5, 099.50, 099.51, 099.52, 099.53, 099.54, 099.55, 099.56, 099.59, 099.8, 099.9, 131, 131.0, 131.00, 131.01, 131.02, 131.03, 131.09, 131.8, 131.9, 647.0, 647.01, 647.02, 647.03, 647.04, 647.1, 647.10, 647.11, 647.12, 647.13, 647.14, 647.2, 647.20, 647.21, 647.22, 647.23, 647.24 |
| Other (included gastrointestinal, mastitis, and puerperal infections) | 001, 001.0, 001.1, 001.9, 002, 002.0, 002.1, 002.2, 002.3, 002.9, 003, 003.0, 003.1, 003.2, 003.20, 003.21, 003.22, 003.23, 003.24, 003.29, 003.8, 003.9, 004, 004.0, 004.1, 004.2, 004.3, 004.8, 004.9, 005, 005.0, 005.1, 005.2, 005.3, 005.4, 005.8, 005.81, 005.89, 005.9, 006, 006.0, 006.1, 006.2, 006.3, 006.4, 006.5, 006.6, 006.7, 006.8, 006.9, 007, 007.0, 007.1, 007.2, 007.3, 007.4, 007.5, 007.8, 007.9, 008, 008.0, 008.01, 008.02, 008.03, 008.04, 008.09, 008.1, 008.2, 008.3, 008.4, 008.41, 008.42, 008.43, 008.44, 008.45, 008.46, 008.47, 008.49, 008.5, 008.6, 008.61, 008.62, 008.63, 008.64, 008.65, 008.66, 008.67, 008.69, 008.8, 009, 009.1, 009.2, 009.3, 022.3, 036.2, 038.0, 038.1, 038.10, 038.11, 038.12, 038.19, 038.2, 038.3, 038.4, 038.40, 038.41, 038.42, 038.43, 038.44, 038.49, 038.8, 038.9, 054.5, 449, 646.6, 647, 647.0, 647.1, 647.2,                                                                                                                                                                                                                                                                                                                                                                                                                                                                                                                                                                                                      |

|                                                                                                                                                                                                                                                                                                                                                                                                                                                                                                                                                                                                                                                                                                                                                                                                                                                                                                                                                                                                                                                                                                                                    |
|------------------------------------------------------------------------------------------------------------------------------------------------------------------------------------------------------------------------------------------------------------------------------------------------------------------------------------------------------------------------------------------------------------------------------------------------------------------------------------------------------------------------------------------------------------------------------------------------------------------------------------------------------------------------------------------------------------------------------------------------------------------------------------------------------------------------------------------------------------------------------------------------------------------------------------------------------------------------------------------------------------------------------------------------------------------------------------------------------------------------------------|
| 647.3, 647.4, 647.5, 647.6, 647.8, 647.9, 647.0, 647.00, 647.10, 647.20, 647.30, 647.40, 647.50, 647.60, 647.80, 647.90, 670.0, 670.1, 670.2, 670.20, 670.22, 670.3, 670.32, 670.34, 670.4, 670.5, 670.6, 670.7, 670.8, 670.9, 672.0, 672.1, 672.2, 672.3, 672.4, 672.5, 672.6, 672.7, 672.8, 672.9, 675, 675.0, 675.00, 675.01, 675.02, 675.03, 675.04, 675.1, 675.10, 675.11, 675.12, 675.13, 675.14, 675.2, 675.20, 675.21, 675.22, 675.23, 675.24, 675.8, 675.80, 675.81, 675.82, 675.83, 675.84, 675.9, 675.90, 675.91, 675.92, 675.93, 675.94681.0, 681.00, 681.01, 681.02, 681, 681.10, 681.11, 681.9, 682, 682.0, 682.1, 682.2, 682.3, 682.4, 682.5, 682.6, 682.7, 682.8, 682.9, 686, 686.0, 686.00, 686.01, 686.09, 686.1, 686.8, 686.9, 088.81, 020.2, 020.3, 020.4, 020.5, 031.0, 083.0, 114.1, 647.3, 647.30, 647.31, 647.32, 647.33, 647.34, 647.4, 647.40, 647.41, 647.42, 647.43, 647.44, 647.5, 647.50, 647.51, 647.52, 647.53, 647.54, 647.6, 647.60, 647.61, 647.62, 647.63, 647.64, 647.8, 647.80, 647.81, 647.82, 647.83, 647.84, 647.9, 647.90, 647.91, 647.92, 647.93, 647.94, 790.7, 995.91, 995.92, 785.52 |
|------------------------------------------------------------------------------------------------------------------------------------------------------------------------------------------------------------------------------------------------------------------------------------------------------------------------------------------------------------------------------------------------------------------------------------------------------------------------------------------------------------------------------------------------------------------------------------------------------------------------------------------------------------------------------------------------------------------------------------------------------------------------------------------------------------------------------------------------------------------------------------------------------------------------------------------------------------------------------------------------------------------------------------------------------------------------------------------------------------------------------------|

| <b>Supplemental Table II. Diagnostic codes used to identify postpartum admissions for stroke</b>                                                                                                                                                                                            |                                                                                             |
|---------------------------------------------------------------------------------------------------------------------------------------------------------------------------------------------------------------------------------------------------------------------------------------------|---------------------------------------------------------------------------------------------|
| Ischemic stroke                                                                                                                                                                                                                                                                             | 433.01, 433.10, 433.11, 433.21, 433.31, 433.81, 433.91, 434.00, 434.01, 434.11, 434.91, 436 |
| Subarachnoid hemorrhage                                                                                                                                                                                                                                                                     | 430, 430.0, 430.00                                                                          |
| Intracerebral hemorrhage                                                                                                                                                                                                                                                                    | 431, 431.0, 431.00                                                                          |
| Acute cerebrovascular disease in the puerperium                                                                                                                                                                                                                                             | 674.0, 674.01, 674.03, 674.04                                                               |
| The above codes in any diagnostic position in a readmission after delivery were included in the outcome of all postpartum stroke. Traumatic intracerebral or subarachnoid hemorrhage, subdural hematoma, transient ischemic attack, and cerebral venous sinus thrombosis were not included. |                                                                                             |
